# Supplementary material for: Higher Landing Accuracy in Expert Pilots is Associated with Lower Activity in the Caudate Nucleus
Source: PLoS One. 2014 Nov 26;9(11):e112607. doi: 10.1371/journal.pone.0112607 (PMC4245093; doi:10.1371/journal.pone.0112607)
Supplement: Table S1 — Raw Data for all Analyses Reported in the Manuscript. (XLSX) [file pone.0112607.s001.xlsx]

## Sheet: ils_raw_data_n20_140826
subn	exp_group	age_group	age_yrs	Education_yrs	cauc_non_hisp	gender	Flight_Hours_hrs	past_month_non_sim_hrs	FAA_Medical_Expir_Status	Present_Employment	exercise_yn	health_problems	caud_bilat_all_total	hit_prop	miss_prop	false_alarm_prop	corr_reject_prop	d_prime	insula_all	mid_front_all	sup_front_inc	aileron
2	High	Young	42.7214	18	Y	M	910	4	Current	Fulltime	Y	high_cholesterol		1	0	1	0
3	High	Young	43.0445	16	N	M	10000	50	Current	Fulltime	Y	None	0.50143	1	0	0.625	0.375	3.40038	0.62098	0.6741		3.68449
4	High	Old	46.0178	14	Y	M	5500	30	Current	Fulltime	Y	None	0.55076	1	0	0.25	0.75	4.39351	0.47412	0.14215		3.2939
5	Low	Young	20.4654	15	Y	M	368	1.6	Current	Parttime	Y	None	1.3795	0.9375	0.0625	0.4	0.6	1.78747	1.5444	1.18951	3.2001	1.96098
6	High	Young	43.8084	18	N	M	3200	0	Current	Fulltime	Y	None	1.6251	0.833333	0.166667	0	1	4.50751	1.2562	0.351835	1.413	3.25298
9	High	Old	57.2457	14	Y	F	10000	9	Current	Unemployed	Y	None	0.17858	0.111111	0.888889	0.25	0.75	-0.546151	0.18265	1.8255	0.10702	20.9823
12	Low	Old	64.5421	19	Y	M	1380	5	Current	Parttime	Y	None	3.4455	0.888889	0.111111	0.944444	0.0555556	-0.372578	1.5867	2.452	4.6334	10.4528
13	High	Old	54.8118	12	Y	M	4400	78.5	Current	Self_Employed	Y	high_cholesterol	2.3425	1	0	0	1	7.2591	1.1686	0.84495		4.47634
15	Low	Old	62.6037	18	Y	M	2000	3	Current	Parttime	Y	BP Diabetes	1.0046	0.615385	0.384615	0.461538	0.538462	0.38994	0.34793	1.72003	1.8305	13.2752
16	High	Young	27.0746	16	N	M	1550	18	Current	Fulltime	N	None	1.1107	0.933333	0.0666667	0	1	5.04117	0.35189	0.002452	0.073662	6.45788
19	Low	Old	64.1561	16	Y	M	1100	6	Current	Fulltime	Y	BP	1.819	0.611111	0.388889	0.6	0.4	0.028869	0.33962	2.2602	2.7647	11.976
22	High	Young	27.2909	16	Y	F	1250	10	Current	Fulltime	N	None	0.1273	0.533333	0.466667	0	1	3.62374	0.10842	0.71181	0.54931	3.9426
25	High	Young	40.0465	16	Y	M	1390	80	Current	Self_Employed	N	None	0.63283	0.846154	0.153846	0.214286	0.785714	1.81171	1.5281	0.511065	0.27426	5.18831
26	Low	Young	39.5181	17	Y	M	640	0	Current	Fulltime	Y	None	3.8228	0.8	0.2	0.5	0.5	0.841621	1.9692	0.60968	0.87995	3.46608
29	High	Young	29.796	16	Y	M	1800	70	Current	Self_Employed	Y	None	2.3435	1	0	0.0909091	0.909091	5.05419	2.6479	0.268465		5.04511
31	High	Young	34.1766	17	Y	M	2400	15	Current	Fulltime	N	None	0.8477	1	0	0	1	7.2591	2.1647	0.9296		5.97134
32	Low	Old	59.7864	13	Y	M	2000	2	Current	Retired	N	None	1.6933	1	0	0.846154	0.153846	2.69894	1.3003	0.121645		4.53633
46	High	Old	54.0123	16	Y	M	1540	40	Current	Self_Employed	Y	None	0.37411	0.6	0.4	0.0909091	0.909091	1.58852	0.493	0.429955	0.62513	6.17098
47	Low	Old	63.9425	18	Y	M	550	2.5	Current	Fulltime	Y	None	0.45549	0.666667	0.333333	0.0769231	0.923077	1.8568	0.44684	0.674985	2.07	10.5463
88	Low	Old	66.0643	19	Y	M	1050	1	Current	Retired	Y	None	1.6794	0.615385	0.384615	0.363636	0.636364	0.642137	0.3583		0.41386	10.1993
